# Supplementary material
Source: PubMed Central journal article supplement (PMC374346)

HIV-1 WT

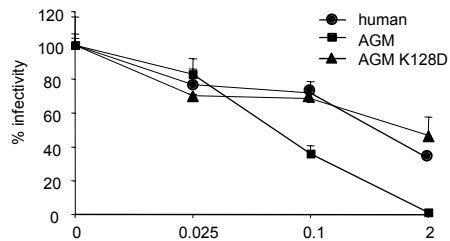

SIV<sub>AGM</sub> WT

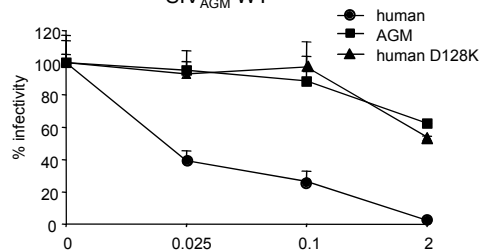

HIV-1  $\Delta\text{vif}$

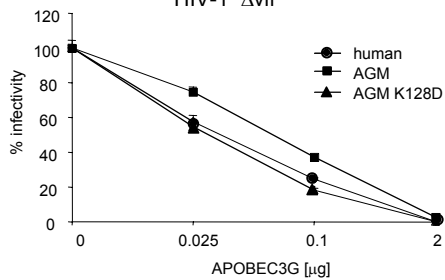

SIV<sub>AGM</sub>  $\Delta\text{vif}$

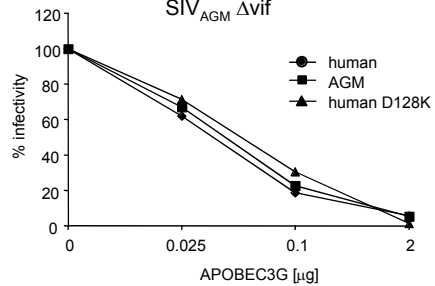

Supplement: pnas_101_11_3927__2.pdf [file pnas_101_11_3927__2.pdf]
